# Supplementary material for: Simple suture whipstitch closure is a reasonable option for many patients requiring temporary abdominal closure for blunt or penetrating trauma
Source: HighWire-hosted journal article supplement (doi:10.1136/tsaco-2022-000980), 2022-10-01
Supplement: tsaco-2022-000980supp001_data_supplement.pdf [file tsaco-2022-000980supp001_data_supplement.pdf]

## Supplement

Table S1. Summary of univariate and multivariate regression analyses examining the linear association between temporary abdominal closure (TAC) method and outcomes.

|                                                                | Estimate | Standard.<br>Error | t value | p-value |
|----------------------------------------------------------------|----------|--------------------|---------|---------|
| Univariate model-Association between type of TAC and LOS       |          |                    |         |         |
| (Intercept) ABTHERA™                                           | 26.13    | 2.12               | 12.35   | < 0.001 |
| Whipstitch                                                     | -7.22    | 3.34               | -2.16   | 0.032   |
| Multivariate model-Association between type of TAC and LOS     |          |                    |         |         |
| (Intercept) ABTHERA™                                           | -0.81    | 3.34               | -0.24   | 0.807   |
| Whipstitch                                                     | -4.00    | 2.31               | -1.73   | 0.086   |
| ISS                                                            | 0.36     | 0.09               | 3.96    | < 0.001 |
| Duration of TAC placement                                      | 0.03     | 0.01               | 3.84    | < 0.001 |
| Number of Laparotomies                                         | 3.37     | 0.55               | 6.12    | < 0.001 |
| Univariate model-Association between type of TAC and ICU LOS   |          |                    |         |         |
| (Intercept) ABTHERA™                                           | 17.58    | 1.73               | 10.18   | < 0.001 |
| Whipstitch                                                     | -5.49    | 2.73               | -2.01   | 0.047   |
| Multivariate model-Association between type of TAC and ICU LOS |          |                    |         |         |
| (Intercept) ABTHERA™                                           | -5.85    | 2.74               | -2.14   | 0.035   |
| Whipstitch                                                     | -3.09    | 1.89               | -1.63   | 0.105   |
| ISS                                                            | 0.29     | 0.08               | 3.80    | < 0.001 |
| Duration of TAC placement                                      | 0.02     | 0.01               | 3.32    | 0.001   |
| Number of Laparotomies                                         | 3.28     | 0.45               | 7.26    | < 0.001 |

LOS-Length of stay

Table S2. Patient Demographic Characteristics.

| Characteristic                            | ABTHERA™ n<br>= 57 (Mean ±<br>SD) | Whipstitch<br>Closure n = 29<br>(Mean ± SD) | Both Procedures n=<br>26 (Mean ± SD) | p-value          |
|-------------------------------------------|-----------------------------------|---------------------------------------------|--------------------------------------|------------------|
| Age                                       | 38.5 ± 17.7                       | 38.3 ± 19.9                                 | 45.0 ± 17.8                          | 0.278            |
| Sex (male) n (%)                          | 46 (82.1)                         | 24 (82.8)                                   | 21 (80.8)                            | 0.987            |
| BMI                                       | 30.4 ± 7.6                        | 29.5 ± 6.7                                  | 30.6 ± 5.3                           | 0.791            |
| ISS                                       | 26.6 ± 11.8                       | 24.2 ± 9.8                                  | 29.24 ± 13.7                         | 0.293            |
| ASA                                       | 3.8 ± 1.0                         | 3.7 ± 1.0                                   | 3.9 ± 1.0                            | 0.893            |
| Duration of TAC<br>placement (hours)<br>‡ | 84.9 (251.5) <sup>a</sup>         | 25.8 (20.6) <sup>b</sup>                    | 105.7 (357.1) <sup>a</sup>           | <b>0.026</b>     |
| Number of<br>Laparotomies‡                | 3.0 (3.0) <sup>a</sup>            | 2.0 (0.0) <sup>b</sup>                      | 4.5 (4.0) <sup>c</sup>               | <b>&lt;0.001</b> |

Values with different superscripts in a row are significantly different using post-hoc comparisons with Holm-Bonferroni correction; ‡ Comparisons done using Kruskal Wallis test, summarized as median ± Interquartile range (IQR)

Table S3. Patient Outcomes.

| <b>Outcome</b>                              | <b>ABTHERA™ n =<br/>57</b> | <b>Whipstitch<br/>Closure n = 29</b> | <b>Both Procedures<br/>n = 26</b> | <b>p-value</b>   |
|---------------------------------------------|----------------------------|--------------------------------------|-----------------------------------|------------------|
| Length of stay‡                             | 19 (20.3) <sup>a</sup>     | 9 (10) <sup>b</sup>                  | 22.5 (18.5) <sup>a</sup>          | <b>&lt;0.001</b> |
| ICU LOS‡                                    | 12 (16.0) <sup>a</sup>     | 5 (5.0) <sup>b</sup>                 | 17 (17.0) <sup>a</sup>            | <b>&lt;0.001</b> |
| Ventilator days‡                            | 6 (14) <sup>ab</sup>       | 3 (4.5) <sup>a</sup>                 | 10 (11.3) <sup>b</sup>            | <b>&lt;0.001</b> |
| Duration for definitive<br>closure (days) ‡ | 8 (16.0)                   | 1.0 (1.0)                            | 17 (24.0)                         | <b>&lt;0.001</b> |
| Mortality                                   | 13 (23.2)                  | 10 (34.4)                            | 5 (19.2)                          | 0.380            |
| <b>Complications n (%)</b>                  |                            |                                      |                                   |                  |
| Bleeding                                    | 16 (28.5)                  | 8 (27.6)                             | 10 (38.5)                         | 0.610            |
| Evisceration                                | 4 (7.1)                    | 0 (0)                                | 3 (1.1)                           | 0.229            |
| Wound dehiscence                            | 5 (8.9)                    | 0 (0)                                | 5 (19.2)                          | <b>0.040</b>     |
| Reoperations                                | 5 (9.1)                    | 1 (3.4)                              | 2 (7.7)                           | 0.801            |

LOS: Length of stay; Values with different superscripts in a row are significantly different using post-hoc comparisons with Holm-Bonferroni correction; ‡ Comparisons done using Kruskal Wallis test, summarized as median ± Interquartile range (IQR)
